# Supplementary material
Source: MDPI journal article supplement (https://www.mdpi.com/2076-3417/14/1/66)
Supplement: s1 [file s1]

**Table S1.** Analytical parameters of LC-MS quantitative method; data for calibration curves, and lowest limit of quantification (LLOQ) and upper limit of quantification (ULOQ) values for each analyzed phenolic compound standard.

| Compound                  | MRM transition<br>used for<br>quantification | Regression equation      | R <sup>2</sup> | LLOQ<br>(ng/mL) | ULOQ<br>(ng/mL) |
|---------------------------|----------------------------------------------|--------------------------|----------------|-----------------|-----------------|
| 3,4-Dihydroxybenzoic acid | 153/108.9                                    | $y = 0.12306x + 0.09052$ | 0.9916         | 1.0             | 200.0           |
| Caffeic acid              | 179/135.0                                    | $y = 0.25098x + 0.20703$ | 0.9872         | 1.0             | 200.0           |
| Syringic acid             | 197/181.9                                    | $y = 0.02423x + 0.00407$ | 0.9988         | 1.0             | 500.0           |
| 4-Hydroxybenzaldehyde     | 121/91.9                                     | $y = 0.45778 + 0.39034$  | 0.9946         | 1.0             | 200.0           |
| <i>p</i> -Coumaric acid   | 163/119                                      | $y = 0.18734x + 0.16147$ | 0.9914         | 1.0             | 200.0           |
| Ferulic acid              | 193/177.9                                    | $y = 0.03000x + 0.00511$ | 0.9986         | 1.0             | 500.0           |
| trans-Cinnamic acid       | 146.9/77                                     | $y = 0.00965x + 0.00095$ | 0.9904         | 1.0             | 500.0           |
